# Supplementary material for: Modulation of Allicin-Free Garlic on Gut Microbiome
Source: MDPI journal article supplement (doi:10.3390/molecules25030682), 2020-02-05
Supplement: s1 [file s1]

**Appendix Table S1. Nutrient analysis 2017**

| <b>Nutrients</b>              | <b>AFG</b> | <b>Method</b>                             |
|-------------------------------|------------|-------------------------------------------|
| <b>Calorie (kcal/100g)</b>    | 357.5      | Calorie=Protein*4+Lipid*9+Carbohydrates*4 |
| <b>Protein (g/100g)</b>       | 13.05      | Kaida's method                            |
| <b>Lipid (g/100g)</b>         | 1.4        | Acid decomposition method                 |
| <b>Carbohydrates (g/100g)</b> | 73.2       | 100-(protein+lipid+moisture+ash)          |
| <b>Salt (g/100g)</b>          | 0.02       | Sodium conversion                         |
| <b>Sodium (mg/100g)</b>       | 8.5        | Atomic absorption spectroscopy            |
| <b>Moisture (g/100g)</b>      | 8.9        | High pressure drying                      |
| <b>Ash (g/100g)</b>           | 3.75       | Ashing method                             |
| <b>Fructan (mg/g)</b>         | 468.8      | Fructan analysis kit                      |
| <b>G-SAC (mg/g)</b>           | 23.675     | HPLC                                      |
| <b>Alliin (mg/g)</b>          | 17.415     | HPLC                                      |
| <b>SAC (mg/g)</b>             | 0.785      | HPLC                                      |
| <b>Allicin (mg/g)</b>         | 0          | HPLC                                      |
| <b>Organosulfide (mg/g)</b>   | 41.875     |                                           |
| <b>Fructan/Sulfide</b>        | 11.195     |                                           |
