# Supplementary material for: Modulation of Allicin-Free Garlic on Gut Microbiome
Source: MDPI journal article supplement (doi:10.3390/molecules25030682), 2020-02-05
Supplement: s1 [file s1]

**Appendix Table S2. Dietary compositions of each group**

| <b>Components<br/>(%)</b>     | <b>ND</b> | <b>ND<br/>1AFG</b> | <b>ND<br/>5AFG</b> | <b>HFD</b> | <b>HFD<br/>1AFG</b> | <b>HFD<br/>5AFG</b> |
|-------------------------------|-----------|--------------------|--------------------|------------|---------------------|---------------------|
| Lard                          | 6.0       | 6.0                | 6.0                | 40.0       | 40.0                | 39.8                |
| Corn starch                   | 54.0      | 54.0               | 49.0               | 20.0       | 20.0                | 15.2                |
| Casein                        | 21.0      | 21.0               | 21.0               | 21.0       | 21.0                | 21.0                |
| Sucrose                       | 10.0      | 9.0                | 10.0               | 10.0       | 9.0                 | 10.0                |
| Cellulose                     | 4.0       | 4.0                | 4.0                | 4.0        | 4.0                 | 4.0                 |
| Mineral mix                   | 3.5       | 3.5                | 3.5                | 3.5        | 3.5                 | 3.5                 |
| Vitamin mix                   | 1.0       | 1.0                | 1.0                | 1.0        | 1.0                 | 1.0                 |
| Choline chloride              | 0.2       | 0.2                | 0.2                | 0.2        | 0.2                 | 0.2                 |
| Methionine                    | 0.3       | 0.3                | 0.3                | 0.3        | 0.3                 | 0.3                 |
| GS (Garlic)                   | —         | 1.0                | 5.0                | —          | 1.0                 | 5                   |
| Total calories<br>(kcal/100g) | 367.8     | 365.1              | 369.1              | 567.4      | 564.7               | 567.6               |
